# Supplementary material for: MicroRNAs promote skeletal muscle differentiation of mesodermal iPSC-derived progenitors
Source: PubMed Central journal article supplement (PMC5665910; doi:10.1038/s41467-017-01359-w), 2017-11-01
Supplement: 41467_2017_1359_MOESM1_ESM.pdf [file 41467_2017_1359_MOESM1_ESM.pdf]

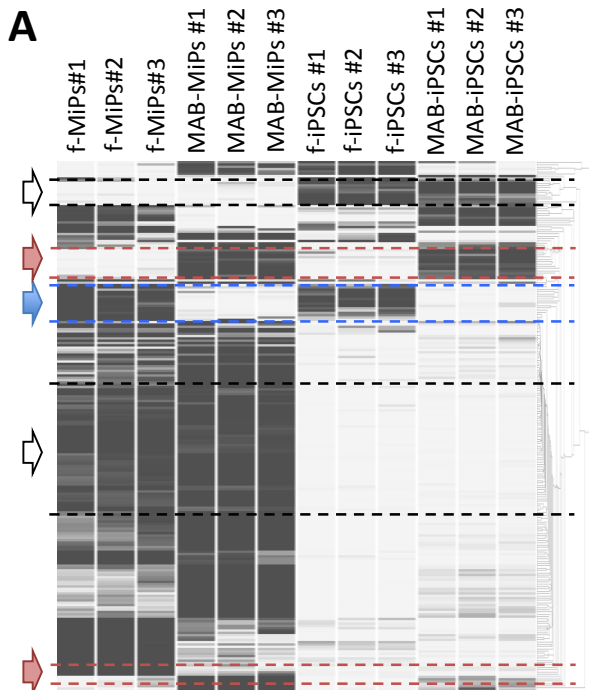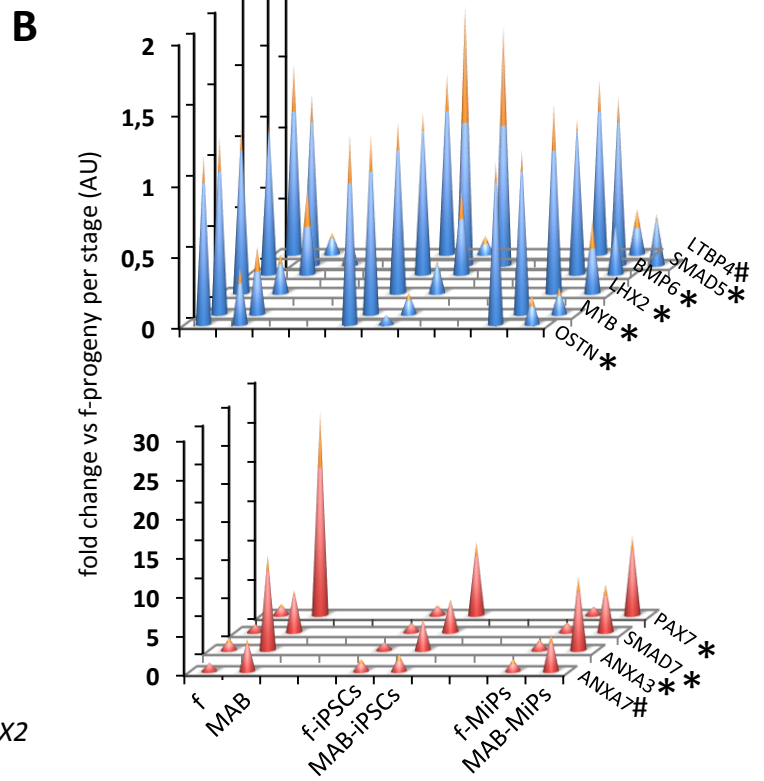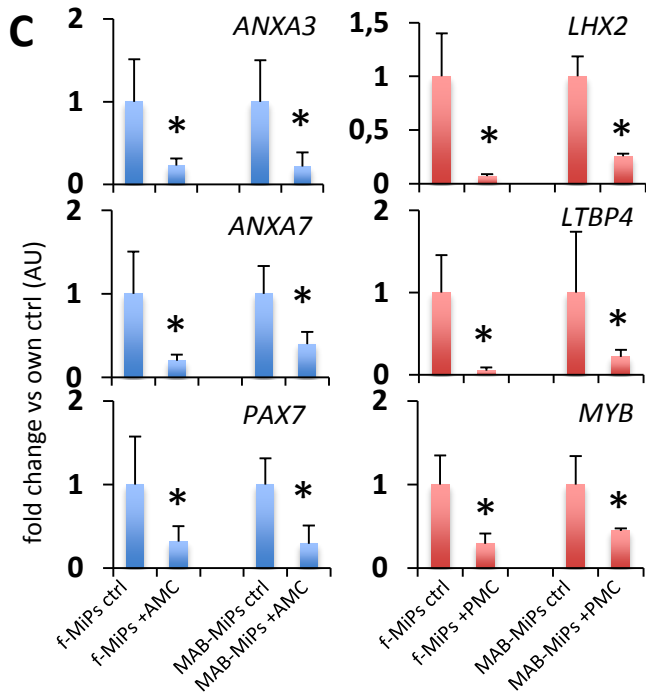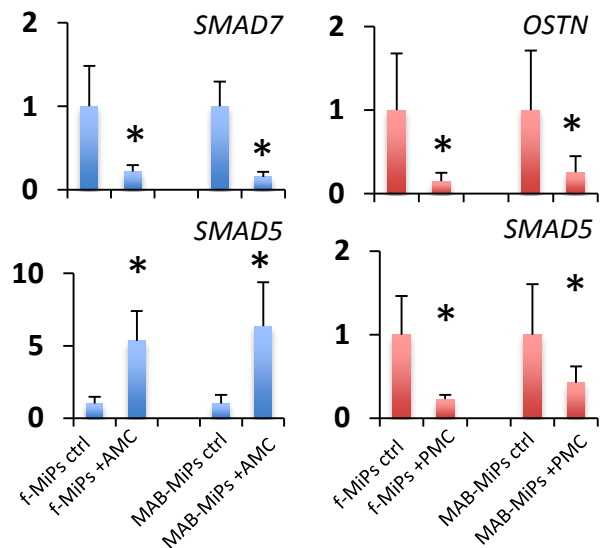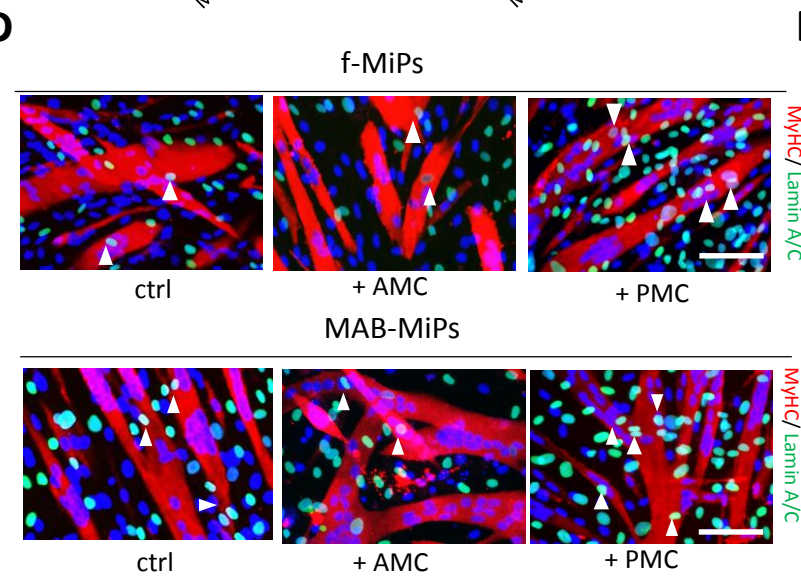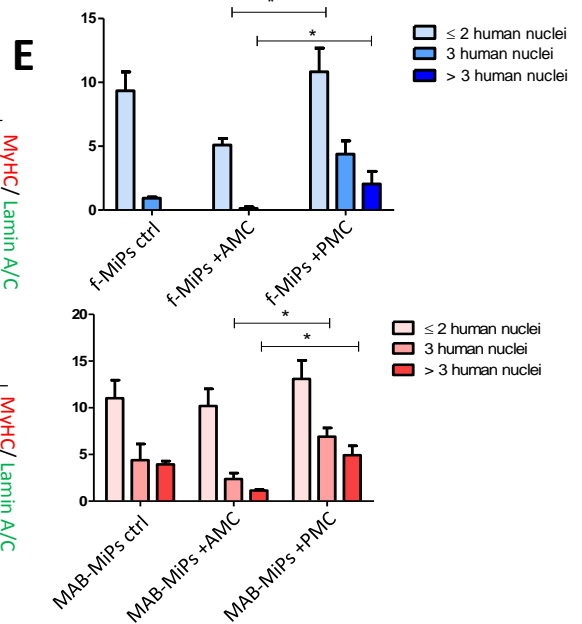

**Supplementary Figure 1. Gene shortlist for propensity perturbation in MiPs.** (A) Heatmap (z-test) of DE genes (threshold, >10 norm counts) discriminating fibroblast- and MAB-MiPs, and fibroblast- and MAB-iPSCs. Emerging patterns of stage-associated (white arrow), fibroblast-progeny-associated (blue arrow) and MAB-progeny-associated (red arrows) are highlighted. (B) Histograms depicting qPCR-assessed expression levels of shortlisted genes, comparing MAB- vs fibroblast-derived cells across stages (somatic, iPSCs, MiPs). Blue bars depict average values of genes enriched in fibroblast-MiPs, red bars relate to genes enriched in MAB-MiPs, yellow spikes depict st.dev values. \*,  $P < 0.05$  MAB- vs fibroblast- at all stages; #,  $P < 0.05$  at somatic and MiP, but not at iPSC stage; Kruskal Wallis and Mann-Whitney U test;  $n = 3$  replicates/clone. (C) Expression levels in MiPs and AMC- or PMC-treated MiPs (gene targeting cocktails) of targeted genes. \*,  $P < 0.05$  vs own ctrl (scramble), Kruskal Wallis and Mann-Whitney U test;  $n = 3$  replicates/clone. (D-E) Quantification of MiP myogenic propensity in co-culture with C2C12 myoblasts after seven days of differentiation. Myotubes with three or more nuclei were counted as well as human nuclei contributing to chimeric myotubes. Representative fields and quantitation of chimeric myotubes are presented.  $P < 0.05$  vs treated and non treated. Kruskal Wallis and Mann-Whitney U test;  $n = 3$  replicates/clone. f-, fibroblast-derived; AMC, anti-myogenic cocktail (gene-based), PMC, pro-myogenic cocktail (gene-based), scale bar approximately 100 $\mu$ m.

○ predicted targets upregulated in MAB-MiPs

**A**

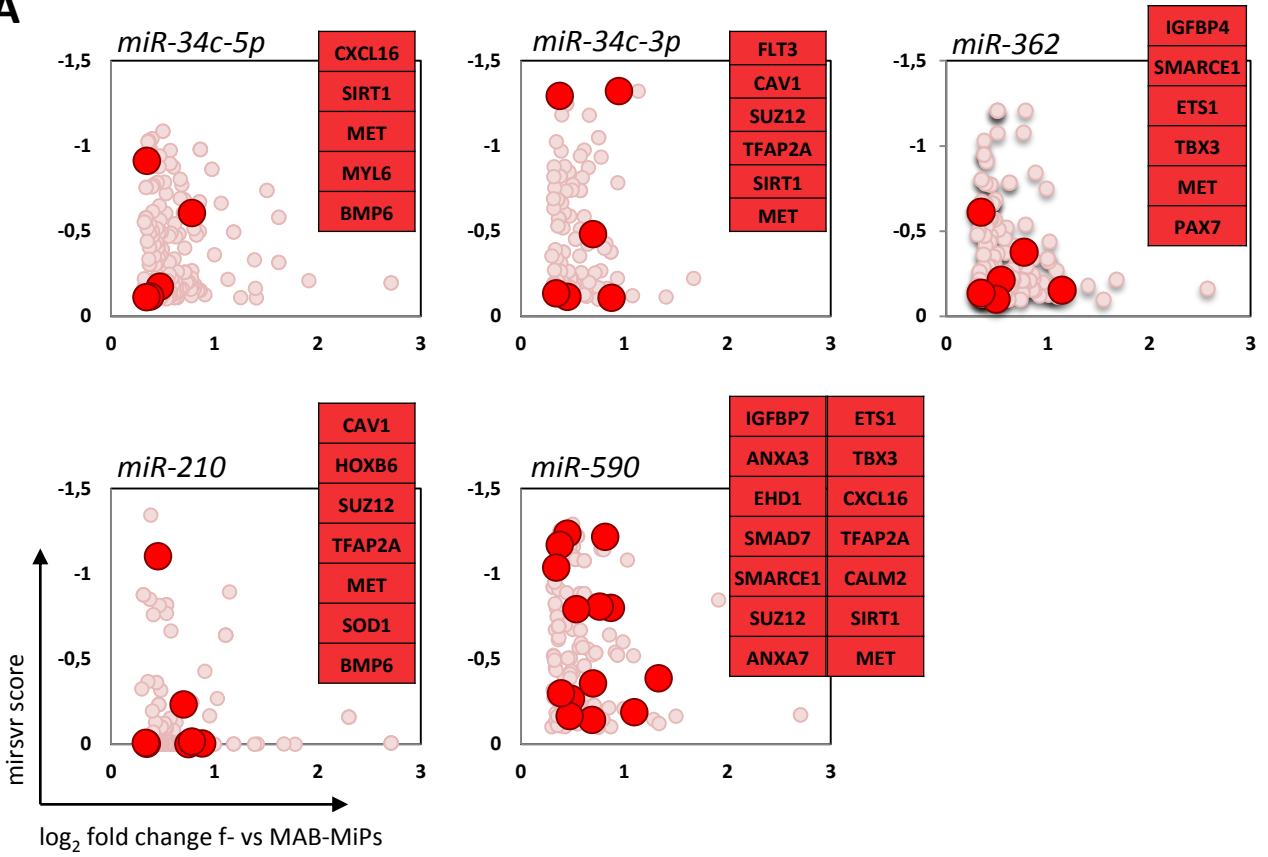

**B**

○ predicted targets upregulated in f-MiPs

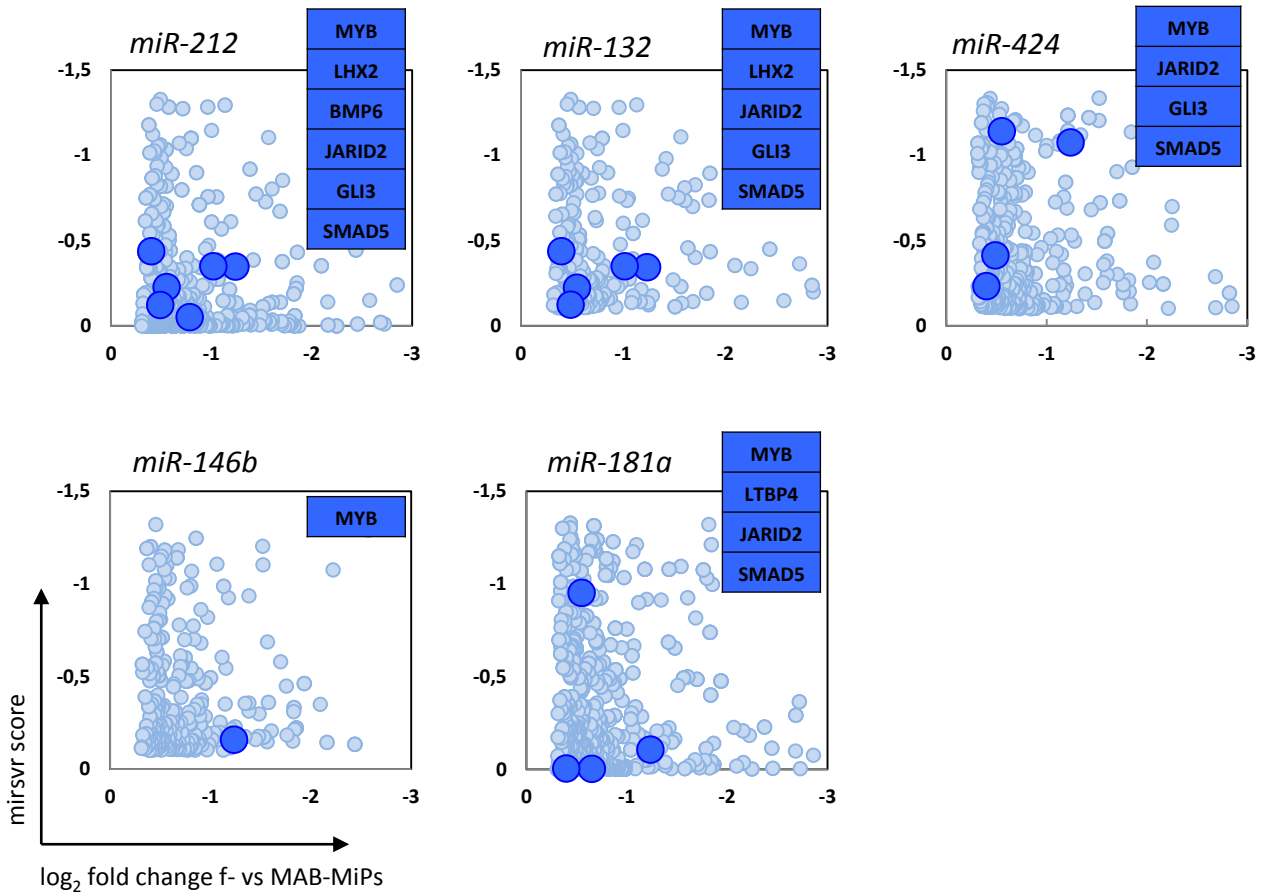

**Supplementary Figure 2. Filtering the candidates from miRNA-seq comparison by means of RNA-seq-based indications.** The mirsvr score vs fold change plots in this Figure illustrate the predicted targets of miRNA-seq-based candidates among RNA-seq-based interesting hits. Specifically, charts in **(A)** depict the predicted targets (interesting hits are highlighted) of fibroblast-MiP-enriched miRNAs among genes upregulated in MAB-MiPs. Conversely, charts in **(B)** depict the predicted targets (interesting hits are highlighted) of MAB-MiP-enriched miRNAs among genes upregulated in fibroblast-MiPs. f-, fibroblast-derived.

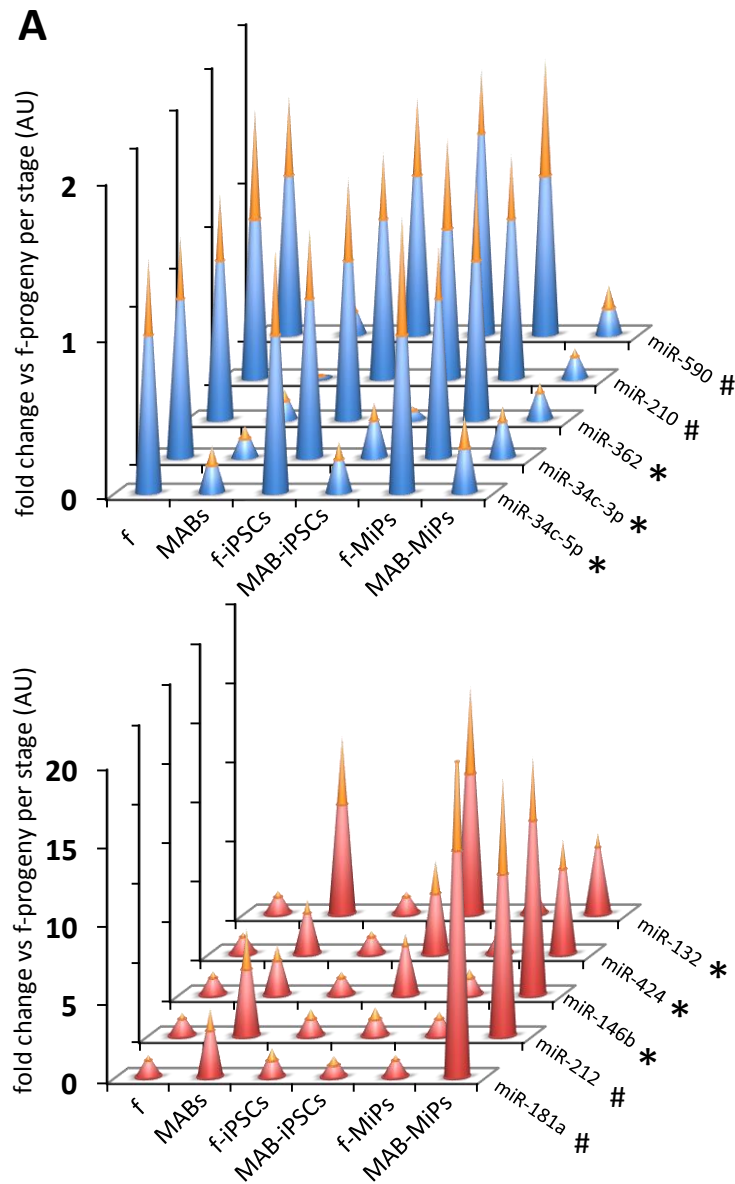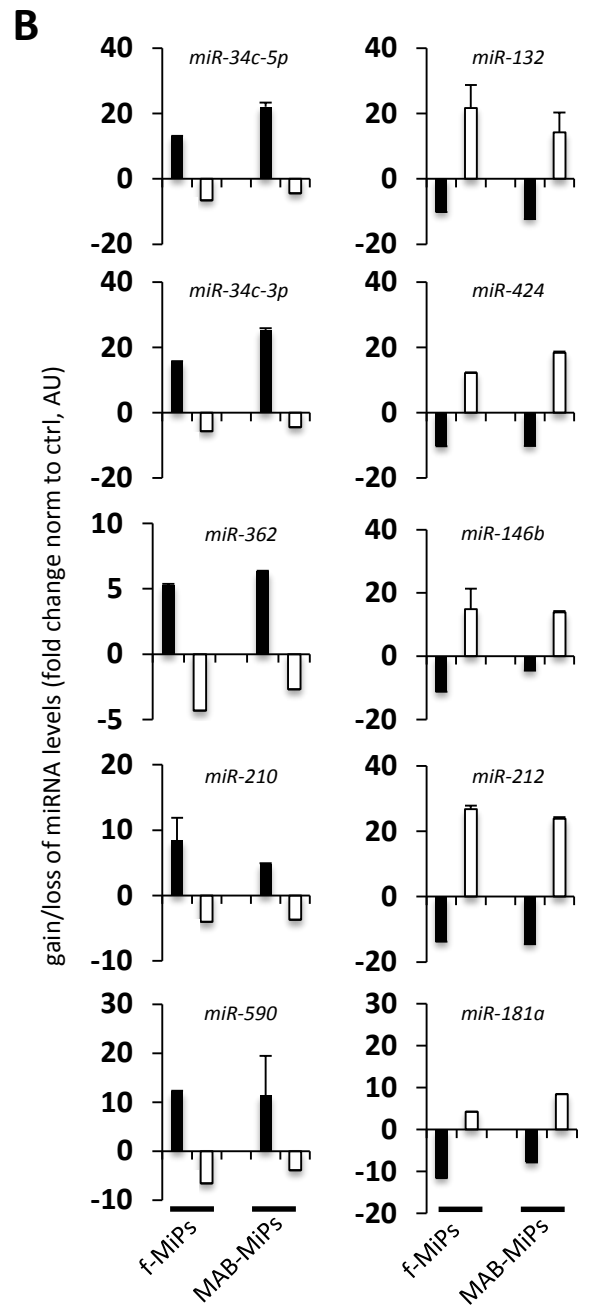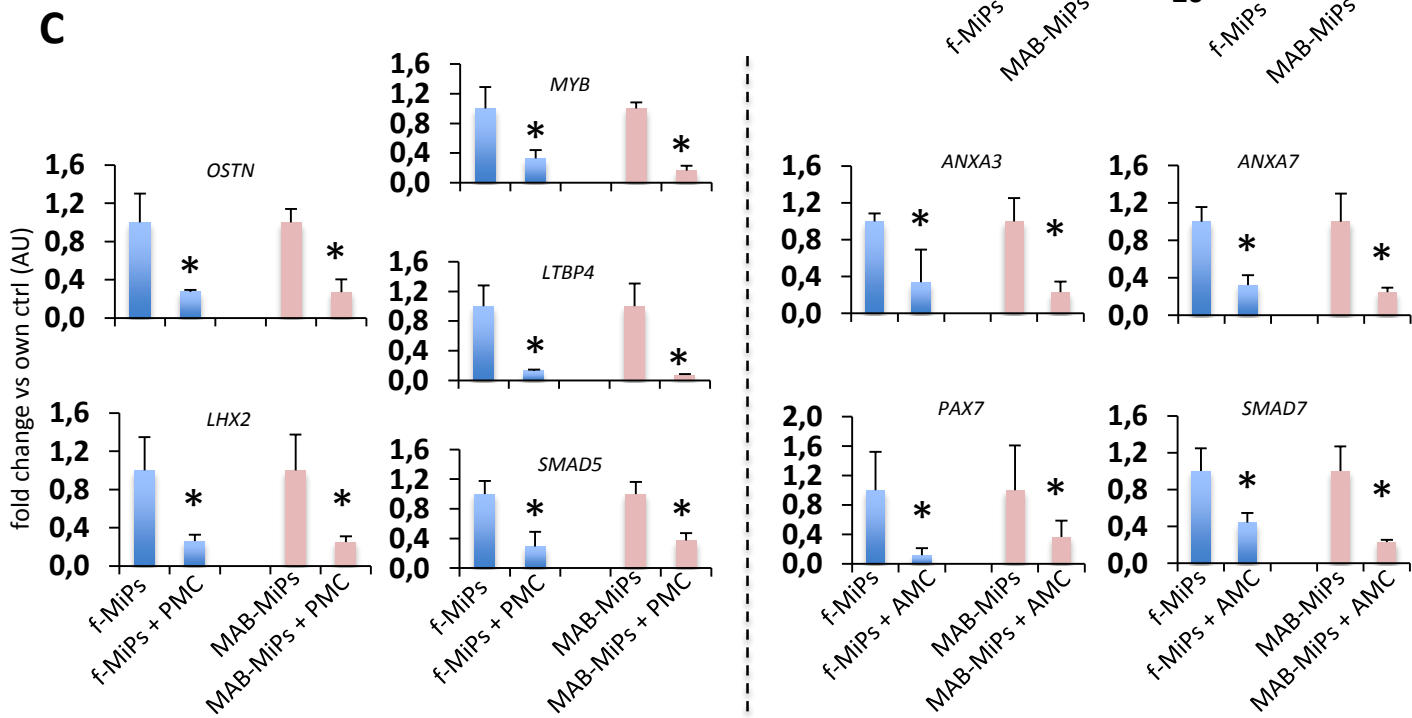

**Supplementary Figure 3. Perturbing miRNAs and predicted targets with AMC and PMC containing miR-mimics and anti-miRs.** (A) qPCR-based validation miRNA-seq-based hits across stages. Blue bars depict average values of genes enriched in fibroblast-MiPs, red bars relate to genes enriched in MAB-MiPs, yellow spikes depict st.dev values. \*, P<0.05 MAB- vs fibroblast- at all stages; #, P<0.05 at somatic and MiP, but not at iPSC stage; Kruskal Wallis and Mann-Whitney U test; n=3replicates/clone. (B) qPCR-based evaluation of target miRNA levels after AMC or PMC administration to MiPs *in vitro*. N=3 replicates/clone; depicted are average±st.dev bars. (C) qPCR-based assay of expression levels of predicted targets of perturbed miRNAs in presence of AMC or PMC. \*, P<0.05 vs own ctrl (scramble), Kruskal Wallis and Mann-Whitney U test; n=3replicates/clone. f-, fibroblast-derived; AMC, anti-myogenic cocktail (miRNA-based), PMC, pro-myogenic cocktail (miRNA-based).

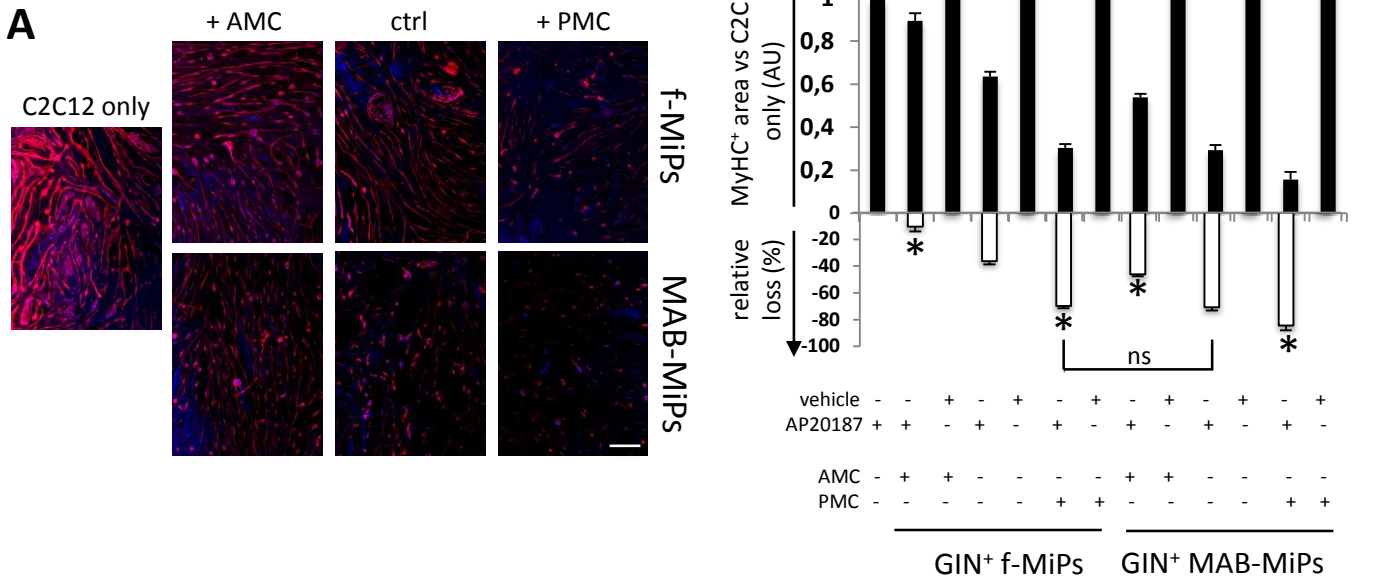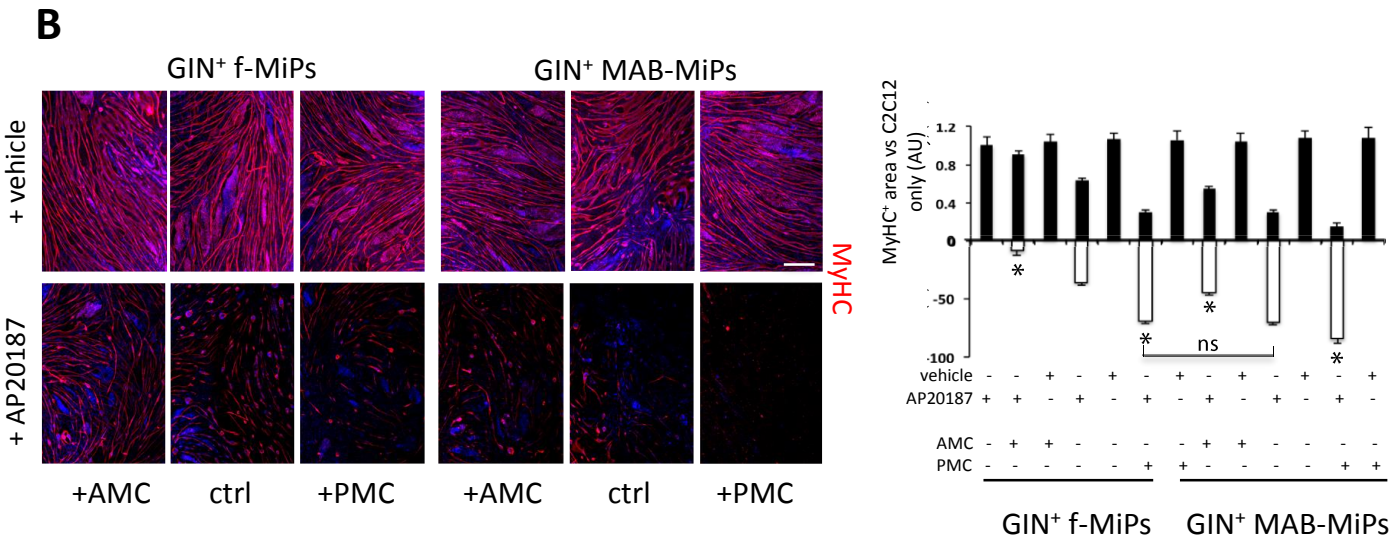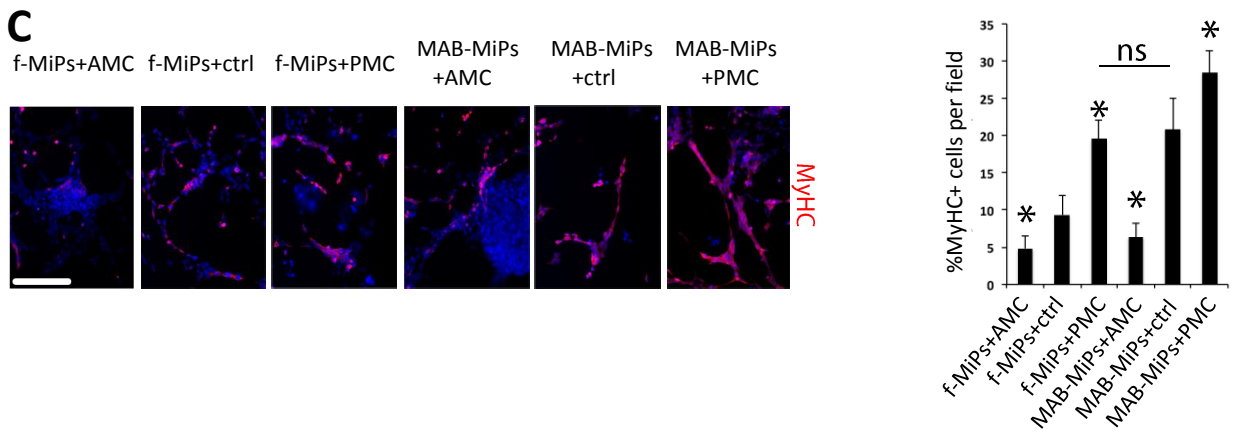

#### Supplementary Figure 4. Co-culture analysis performed in presence of AP20187.

(A) Reverse quantitation of MiP myogenic propensity in co-culture with C2C12 myoblasts after seven days of differentiation. AP20187 induces death of MiP-chimeric myotubes, therefore high propensity associates with high mortality (as depicted in the scheme on the left). Representative fields and quantitation of MyHC signal are presented. ns, non-significant difference; \*,  $P < 0.05$  vs own ctrl (scramble), Kruskal Wallis and Mann-Whitney U test; n=3replicates/clone. f-, fibroblast-derived; AMC, anti-myogenic cocktail (gene-based), PMC, pro-myogenic cocktail (gene-based), scale bar approximately 100 $\mu$ m (B) Reverse quantitation of MiP myogenic propensity in co-culture with C2C12 myoblasts after seven days of differentiation. AP20187 induces death of MiP-chimeric myotubes, therefore high propensity associates with high mortality (as depicted in the scheme on the left). Representative fields and quantitation of MyHC signal are presented, scale bar approximately 100 $\mu$ m (C) Application of AMC and PMC mixes to induced MiP differentiation toward skeletal muscle lineage *in vitro*. Quantitation of differentiation efficiency is reported on the right. f-, fibroblast-derived; AMC, anti-myogenic cocktail , PMC, pro-myogenic cocktail, scale bar approximately 100 $\mu$ m.



**Supplementary Table 1. List for esiRNA target sequences used**

| Target gene  | cDNA Target sequence                                                                                                                                                                                                                                                                                                                                                                                                                                                                                                                                                                                                                                                                                                                                                                        |
|--------------|---------------------------------------------------------------------------------------------------------------------------------------------------------------------------------------------------------------------------------------------------------------------------------------------------------------------------------------------------------------------------------------------------------------------------------------------------------------------------------------------------------------------------------------------------------------------------------------------------------------------------------------------------------------------------------------------------------------------------------------------------------------------------------------------|
| <i>PAX7</i>  | <p>CCAAGATTCTTTGCCGCTACCAGGAGACCGGGTCCATCCGGCCTGGG<br/>                     GCCATCGGCGGCAGCAAGCCCAGACAGGTGGCGACTCCGGATGTAG<br/>                     AGAAAAAGATTGAGGAGTACAAGAGGGAAAACCCAGGCATGTTTCAGCT<br/>                     GGGAGATCCGGGACAGGCTGCTGAAGGATGGGCACTGTGACCGAAG<br/>                     CACTGTGCCCTCAGGTTTAGTGAGTTGATTAGCCGCGTGCTCAGAAT<br/>                     CAAGTTCGGGAAGAAAGAGGAGGAGGATGAAGCGGACAAGAAGGAG<br/>                     GACGACGGCGAAAAGAAGGCCAAACACAGCATCGACGGCATCCTGGG<br/>                     CGACAAAGGGAACCGGCTGGACGAGGGCTCGGATGTGGAGTCGGAA<br/>                     CCTGACCTCCCACTGAAGCGCAAGCAGCGACGCAGTCGGACCACATT<br/>                     CACGGCCGAGCAGCTGGAGGAGCTGGAGAAGGCCCTTTGAGAGGACC<br/>                     CACTACCCAGACATATACACCCGCGAGG</p> |
| <i>SMAD5</i> | <p>GGACCAGGAAGTCCATTTTCAGCTCCCAGCTGATACGCCTCCTCCTGCC<br/>                     TATATGCCACCTGATGATCAGATGGGTCAAGATAATTCAGCCTATG<br/>                     GATAACAAGCAATAATATGATTCCTCAGATTATGCCAGTATATCCAGCA<br/>                     GGGATGTTTCAGCCTGTTGCCTATGAAGAGCCTAAACATTGGTGTTC<br/>                     TAGTCTACTATGAATTAACAATCGTGTGGAGAAGCTTTTCATGCATC<br/>                     TTCTACTAGTGTGTTAGTAGATGGATTCACAGATCCTTCAAATAACAAA<br/>                     AGTAGATTCTGCTTGGGTTTGTGTCAAATGTTAATCGTAATTCGACAA<br/>                     TTGAAAACACTAGGCGACATATTGGAAAAGGTGTTTCATCTGTACTATGT<br/>                     TGGTGGAGAGGTGTATGCGGAATGCCTCAGTGACAGCAG</p>                                                                                                                             |
| <i>OSTN</i>  | <p>CACATTTTCATCCTGGCTGTGACACTGACACTGTGGAGCTCAGGAAAAG<br/>                     TCCTCTCAGTAGATGTAACAACAACAGAGGCCTTTGATTCTGGAGTCAT<br/>                     AGATGTGCAGTCAACACCCACAGTCAGGGAAGAGAAATCAGCCACTGA<br/>                     CCTGACAGCAAACTCTTGCTTCTTGATGAATTGGTGTCCCTAGAAAAT<br/>                     GATGTGATTGAGACAAAGAAGAAAAGGAGTTTCTCTGGTTTTGGGTCT<br/>                     CCCCTTGACAGACTCTCAGCTGGCTCTGTAGATCACAAAGGTAAACAG<br/>                     AGGAAAGTAGTAGATCATCAAAAAGGCGATTGGTATCCCCATGGAT<br/>                     CGGATTGGTAGAAACCGGCTT</p>                                                                                                                                                                                                                          |
| <i>MYB</i>   | <p>GGGCAGTAGAGCTTGGACAGAAAGAAAAGAACTTGGTGTAGGTAAT<br/>                     TGACTATGCACTAGTATTTTCAGACTTTTTAATTTTATATATATACATTT<br/>                     TTTTCTCTGCAATACATTTGAAAACCTGTTTGGGAGACTCTGCATTTT<br/>                     TTATTGTGGTTTTTTTTGTTATTGTTGGTTTATACAAGCATGCGTTGCACTT</p>                                                                                                                                                                                                                                                                                                                                                                                                                                                                                                   |

|              |                                                                                                                                                                                                                                                                                                                                                                                                                                                                                                                                             |
|--------------|---------------------------------------------------------------------------------------------------------------------------------------------------------------------------------------------------------------------------------------------------------------------------------------------------------------------------------------------------------------------------------------------------------------------------------------------------------------------------------------------------------------------------------------------|
|              | <p>CTTTTTGGGAGATGTGTGTTGTTGATGTTCTATGTTTTGTTTTGAGTGT<br/> AGCCTGACTGTTTTATAATTTGGGAGTTCTGCATTTGATCCGCATCCCT<br/> GTGGTTTCTAAGTGTATGGTCTCAGAACTGTTGCATGGATCCTGTGT</p>                                                                                                                                                                                                                                                                                                                                                                        |
| <i>LXH2</i>  | <p>GCTCGGGACTTGGTTTATCACCTCAACTGCTTCACGTGCACCACGTGT<br/> AACAAGATGCTGACCACGGGCGACCACTTCGGCATGAAGGACAGCCT<br/> GGTCTACTGCCGCTTGCACTTCGAGGCGCTGCTGCAGGGCGAGTACC<br/> CCGCACACTTCAACCATGCCGACGTGGCAGCGGGCGGCCGCTGCAGC<br/> CGCGGCGGCCAAGAGCGCGGGGCTGGGCGCAGCAGGGGCCAACCC<br/> TCTGGGTCTTCCCTACTACAATGGCGTGGGCACTGTGCAGAAGGGGC<br/> GGCCGAGGAAACGTAAGAGCCCGGGCCCCGGTGC GGATCTGGCGGC<br/> CTACAACGCTGCGCTAAGCTGCAACGAAAACGACGCAGAGCACCTGG<br/> ACCGTGACCAGCCATACCCGAGCAGCCAGAAGACCAAGCGCATGCGC<br/> ACGTCCTTCAAGCACCACCAGCTTCGGACCATGAAGTCTT</p> |
| <i>LTBP4</i> | <p>CGAGTACGGCCCAGACTTAGGTCCACCTTACCAGGGCCTCCCATATG<br/> GGCCTGAGTTGTACCCACCACCTGCGCTACCCTACGACCCCTACCCA<br/> CCGCCACCTGGGCCCTTCGCCCGCCGGGAGGCTCCTTATGGGGCAC<br/> CCCCTTCGACATGCCAGACTTTGAGGACGATGGTGGCCCCTATGGC<br/> GAATCTGAGGCTCCTGCGCCACCTGGCCCCGGCACCCGCTGGCCCTA<br/> TCGGTCCCGGGACACCCGCCGCTCCTTCCCAGAGCCCGAGGAGCCTC<br/> CTGAAGGTGGAAGCTATGCTGG</p>                                                                                                                                                                                   |
| <i>ANXA3</i> | <p>GTTGGACACCGAGGAACAGTAAGAGATTATCCAGACTTTAGCCCATCA<br/> GTGGATGCTGAAGCTATTCAGAAAGCAATCAGAGGAATTGGAAGTAT<br/> GAGAAAATGCTCATCAGCATTCTGACTGAGAGGTCAAATGCACAGCGG<br/> CAGCTGATTGTTAAGGAATATCAAGCAGCATATGGAAAGGAGCTGAAA<br/> GATGACTTGAAGGGTGATCTCTCTGGCCACTTTGAGCATCTCATGGTG<br/> GCCCTAGTACTCCACCAGCAGTCTTTGATGCAAAGCAGCTAAAGAAA<br/> TCCATGAAGGGCGCGGGAACAAACGAAGATGCCTTGATTGAAATCTTA<br/> ACTACCAGGACAAGCAGGCAATGAAGGATATCTCTCAAGCCTATTAT<br/> ACAGTATAACAAGAAGAGTCTTGGAGATGACATTAGTCCGAAACATCTG<br/> GTGACTTCCGG</p>                      |
| <i>SMAD7</i> | <p>GTGGCATACTGGGAGGAGAAGACGAGAGTGGGGAGGCTCTACTGTGT<br/> CCAGGAGCCCTCTCTGGATATCTTCTATGATCTACCTCAGGGGAATGG<br/> CTTTTGCCTCGGACAGCTCAATTCGACAACAAGAGTCAGCTGGTGCA<br/> GAAGGTGCGGAGCAAAATCGGCTGCGGCATCCAGCTGACGCGGGAG<br/> GTGGATGGTGTGTGGGTGTACAACCGCAGCAGTTACCCCATCTTCATC<br/> AAGTCCGCCACACTGGACAACCCGGACTCCAGGACGCTGTTGGTACA<br/> CAAGGTGTTCCCCGGTTTCTCCATCAAGGCTTTCGACTACGAGAAGGC</p>                                                                                                                                                      |

|              |                                                                                                                                                                                                                                                                                                                                                                                                                                                  |
|--------------|--------------------------------------------------------------------------------------------------------------------------------------------------------------------------------------------------------------------------------------------------------------------------------------------------------------------------------------------------------------------------------------------------------------------------------------------------|
|              | GTACAGCCTGCAGCGGCCCAATGACCACGAGTTTATGCAGCAGCCGT<br>GGACGGGCTTTACCGTGCAGATCAGCTTTG                                                                                                                                                                                                                                                                                                                                                                |
| <i>ANXA7</i> | AGAACTGATCCTGGCCCTCTTCATGCCTCCTACGTATTACGATGCCTG<br>GAGCTTACGGAAAGCAATGCAGGGAGCAGGAACTCAGGAACGTGTAT<br>TGATTGAGATTTTGTGCACAAGAACAATCAGGAAATCCGAGAAATTGT<br>CAGATGTTATCAGTCAGAATTTGGACGAGACCTTGAAAAGGACATTAG<br>GTCAGATACATCAGGACATTTTGAACGTTTACTTGTGTCCATGTGCCAG<br>GGAAATCGTGATGAGAACCAGAGTATAAACCACCAAATGGCTCAGGAA<br>GATGCTCAGCGTCTCTATCAAGCTGGTGAGGGGAGACTAGGGACCGA<br>TGAATCTTGCTTTAACATGATCCTTGCCACAAGAAGCTTTCCTCAGCTG<br>AGAGCTACCATGGAGG |

**Supplementary table 2. List of bisulfite primers used**

| Gene         | Primer Forward              | Primer Reverse                 | Amplicon size |
|--------------|-----------------------------|--------------------------------|---------------|
| <i>OSTN</i>  | AGGGTTTTTATGGAAAAGAAATTTT   | AATTACATATATCATAATTAACATTAATTC | 211 bp        |
| <i>MYB</i>   | AAAGGGGTTTTTATTTTTGTAAATTGT | ATAAAAAAACTACACCCATCTTCCC      | 178 bp        |
| <i>LHX2</i>  | TTTTTTGAAAGAAAGTGTTTTAGATG  | AAAAAAAACCACTAAACCCAAAAAC      | 156 bp        |
| <i>BMP6</i>  | TTTTTTTTATGTTGGATTTGTATAA   | CCCAAATTCACAAAACCTCATAAC       | 268 bp        |
| <i>SMAD5</i> | GTTTAGATTTTGGAGGGAGG        | ATTCATCAAACCATTAAACAACCTTC     | 192 bp        |
| <i>LTBP4</i> | TTAGAATTGGGAGTAGAGAGTTGAG   | TCAAAAAACAACAAAAACAAATACC      | 232 bp        |
| <i>ANXA3</i> | GAGTTGGAGGGATTTTAGTTTTGTAT  | TTTTTCTATCCCCTAACCTTTAAAAC     | 222 bp        |
| <i>PAX7</i>  | GGAGTTTTTGGGATTTATATTTGTT   | AAATCCAAATCTACCAAATTTCAAC      | 124 bp        |
| <i>SMAD7</i> | TATTGGTTTTGTTTTAAAGGTTTTG   | CACACTTCTCCAAACAATCCTAAA       | 250 bp        |
| <i>ANXA7</i> | TATTTGAGGGAAAAAGATTTTTTTT   | AAACTACACCAACCTCCCAATC         | 198 bp        |
