# Supplementary material for: MicroRNAs promote skeletal muscle differentiation of mesodermal iPSC-derived progenitors
Source: PubMed Central journal article supplement (PMC5665910; doi:10.1038/s41467-017-01359-w), 2017-11-01
Supplement: 41467_2017_1359_MOESM3_ESM.pdf [file 41467_2017_1359_MOESM3_ESM.pdf]

## **Description of Additional Supplementary Files**

File Name: Supplementary Data 1

Description: List of GO terms of f-MiPs and MAB- MiPs.

File Name: Supplementary Data 2

Description: mRNAs and miRNAs differentially expressed between fMiPs and MAB-MiPs.

File Name: Supplementary Data 3

Description: List of differentially expressed genes between MiPs treated and untreated.
